# Supplementary material
Source: PubMed Central journal article supplement (PMC7965261)
Supplement: 14-01089.pdf [file 14-01089.pdf]

**On-line Table: Clinical, demographic, and imaging characteristics by DWI infarct volume (<70 or ≥70 mL)**

|                                                                           | DWI <70 mL (n = 70) | DWI ≥70 mL (n = 21) | P Value |
|---------------------------------------------------------------------------|---------------------|---------------------|---------|
| <b>Demographics</b>                                                       |                     |                     |         |
| Age (yr) (median) (range)                                                 | 70 (13–96)          | 72 (35–95)          | .703    |
| Female sex (No.) (%)                                                      | 36 (51)             | 10 (48)             | .389    |
| White race (No.) (%)                                                      | 47 (67)             | 10 (48)             | .627    |
| <b>Medical history</b>                                                    |                     |                     |         |
| Hypertension (No.) (%)                                                    | 53 (76)             | 19 (91)             | .609    |
| Atrial fibrillation (No.) (%)                                             | 31 (44)             | 5 (24)              | .778    |
| Peripheral vascular disease (No.) (%)                                     | 2 (3)               | 1 (5)               | .915    |
| Diabetes mellitus (No.) (%)                                               | 20 (29)             | 8 (38)              | .230    |
| Tobacco (No.) (%)                                                         | 31 (44)             | 10 (48)             | .080    |
| Hyperlipidemia (No.) (%)                                                  | 28 (40)             | 17 (81)             | .049    |
| Coronary artery disease (No.) (%)                                         | 8 (11)              | 12 (57)             | .027    |
| TIA or stroke (No.) (%)                                                   | 17 (24)             | 3 (14)              | .512    |
| <b>Medications</b>                                                        |                     |                     |         |
| Statins (No.) (%)                                                         | 26 (37)             | 6 (29)              | .598    |
| Antiplatelets (No.) (%)                                                   | 29 (41)             | 13 (62)             | .121    |
| Anticoagulants (No.) (%)                                                  | 18 (26)             | 4 (19)              | .523    |
| <b>Radiographic features</b>                                              |                     |                     |         |
| Time last seen well to MRI 0–3 hours (No.) (%)                            | 16 (23)             | 5 (24)              | .906    |
| CT ASPECTS (median) (range)                                               | 9 (4–10)            | 5.5 (1–10)          | <.001   |
| CTA ASPECTS (median) (range)                                              | 9 (4–10)            | 5 (1–10)            | <.001   |
| Hyperdense middle cerebral artery sign (No.) (%)                          | 36 (51)             | 15 (71)             | .075    |
| CT collaterals (≥50%) No. (%)                                             | 45 (64)             | 6 (29)              | .001    |
| <b>Site of occlusion on CTA</b>                                           |                     |                     |         |
| Cervical ICA (No.) (%)                                                    | 4 (6)               | 6 (29)              | .018    |
| ICA terminal segment (No.) (%)                                            | 10 (14)             | 4 (24)              | .341    |
| Proximal M1 segment of the MCA (No.) (%)                                  | 16 (23)             | 11 (52)             | .001    |
| ICA terminal segment or proximal M1 (No.) (%)                             | 22 (31)             | 12 (57)             | .003    |
| Distal M1 segment of the MCA (No.) (%)                                    | 32 (46)             | 12 (57)             | .525    |
| <b>Clinical presentation</b>                                              |                     |                     |         |
| NIHSS (median) (range)                                                    | 15.5 (3–34)         | 19 (9–31)           | .069    |
| Admission glucose level (mg/dL) (median) (range)                          | 129 (48–291)        | 128 (91–238)        | .515    |
| Admission mean arterial pressure (mm Hg) (median) (range)                 | 97 (60–168)         | 102 (73–146)        | .784    |
| <b>Hospital course</b>                                                    |                     |                     |         |
| Intravenous tPA (No.) (%)                                                 | 36 (51)             | 13 (62)             | .688    |
| <b>Stroke mechanism</b>                                                   |                     |                     |         |
| Cardioembolic (No.) (%)                                                   | 41 (59)             | 8 (38)              | .341    |
| Large artery atherosclerosis (No.) (%)                                    | 9 (13)              | 3 (14)              | .971    |
| Dissection (No.) (%)                                                      | 2 (3)               | 1 (5)               | 1.00    |
| Cryptogenic                                                               | 7 (10)              | 5 (24)              | .140    |
| Other (small-vessel, dissection, cryptogenic, other determined) (No.) (%) | 18 (26)             | 10 (48)             | .320    |
| Large-vessel or cardioembolic (No.) (%)                                   | 50 (71)             | 11 (52)             | .320    |
| Large-vessel or cardioembolic (No.) (%)                                   | 48 (69)             | 13 (62)             | .947    |
